# Supplementary material for: Polyoxometalate-stabilized Pt nanoparticles and their electrocatalytic activities
Source: Royal Society of Chemistry journal article supplement (doi:10.1039/c0cp02805c), 2011-01-01
Supplement: c0cp02805c.pdf [file c0cp02805c.pdf]

## Polyoxometalate-stabilized Pt nanoparticles and their electrocatalytic activities

Thomas Hsu-Yao, Kevin P. Browne, Nicole Honesty, and YuYe J. Tong\*

Department of Chemistry, Georgetown University, 37<sup>th</sup> & "O" Streets NW, Washington, DC, 20057, USA.

E-mail: [yyt@georgetown.edu](mailto:yyt@georgetown.edu)

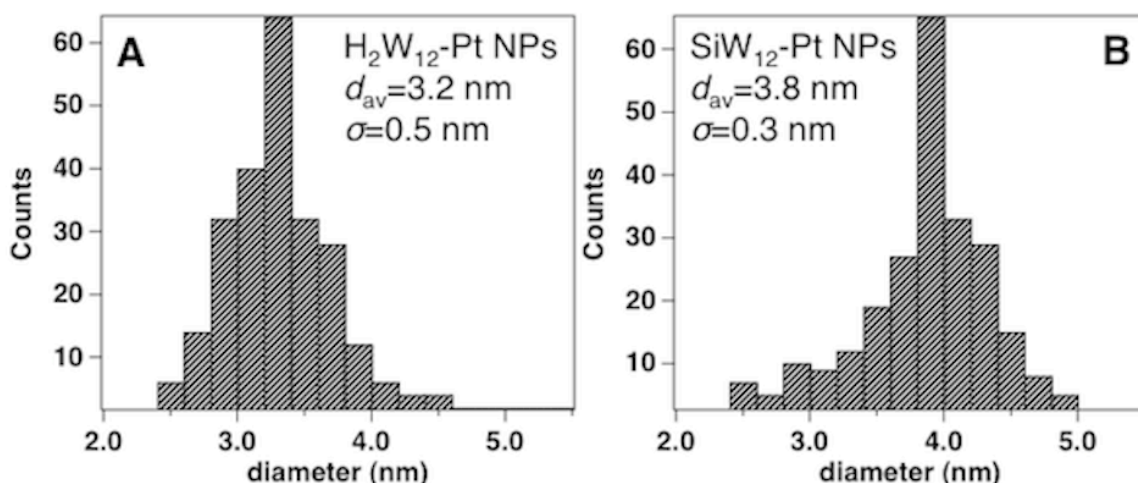

**Figure S1.** The particle size distribution of (A) H<sub>2</sub>W<sub>12</sub>-Pt NPs and (B) SiW<sub>12</sub>-Pt NPs.

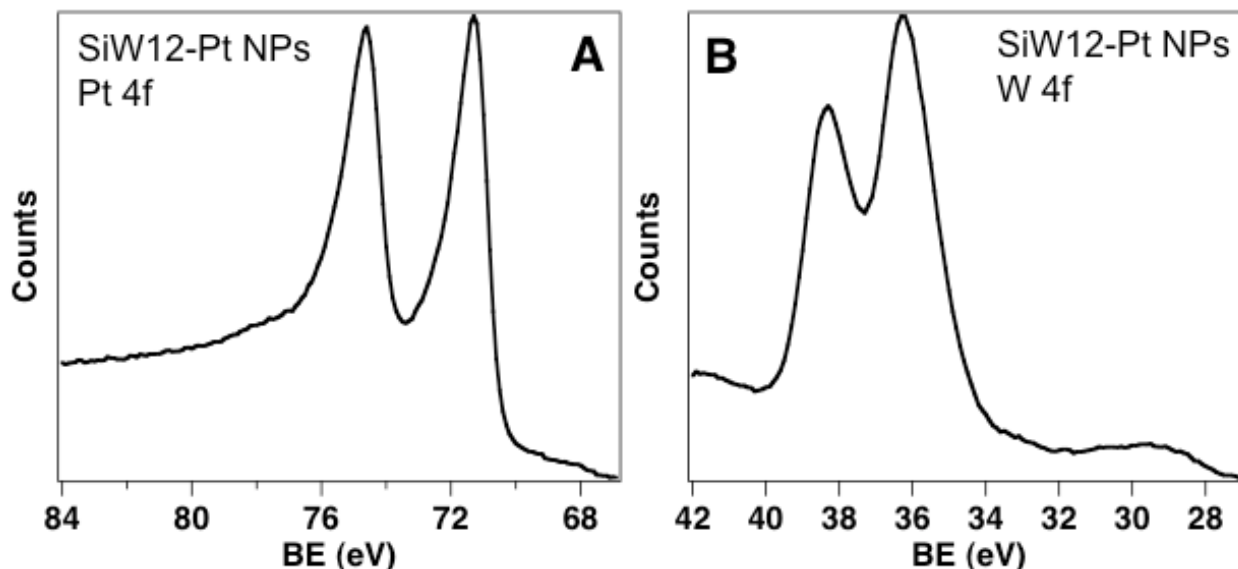

**Figure S2.** The representative XPS spectra of Pt (A) and W (B) of POM-Pt NPs. The binding energies of Pt 4f<sub>7/2</sub> and 4f<sub>5/2</sub> are in agreement with those of metallic Pt (Pt(0)) and those of W 4f<sub>7/2</sub> and 4f<sub>5/2</sub> are in agreement with those of W(VI) expected for W in a Keggin POM structure.
